# Supplementary material for: Microfluidic finger-actuated mixer for ultrasensitive electrochemical measurements of protein biomarkers for point-of-care testing
Source: Royal Society of Chemistry journal article supplement (doi:10.1039/d4lc00207e), 2024-01-01
Supplement: d4lc00207e1.pdf [file d4lc00207e1.pdf]

## Supplementary Information for

### **Microfluidic finger-actuated mixer for ultrasensitive electrochemical measurements of protein biomarkers for point-of-care testing**

Benjamin Utzinger,<sup>a</sup> Desh D. Dixit<sup>a</sup> and Peter B. Lillehoj<sup>\*ab</sup>

<sup>a</sup> Department of Mechanical Engineering, Rice University, 6100 Main St., Houston, TX, 77005, USA

<sup>b</sup> Department of Bioengineering, Rice University, 6500 Main St., Houston, TX, 77030, USA

\*Corresponding author: [lillehoj@rice.edu](mailto:lillehoj@rice.edu)

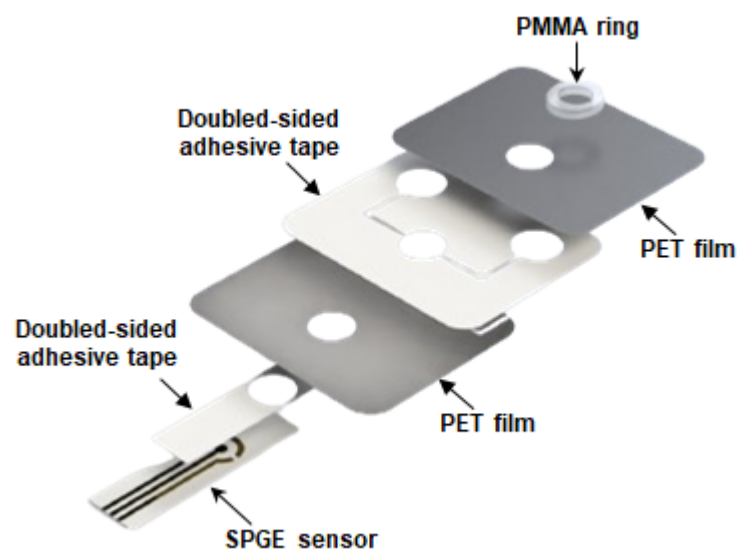

**Figure S1.** Exploded view of the microfluidic immunosensor chip.

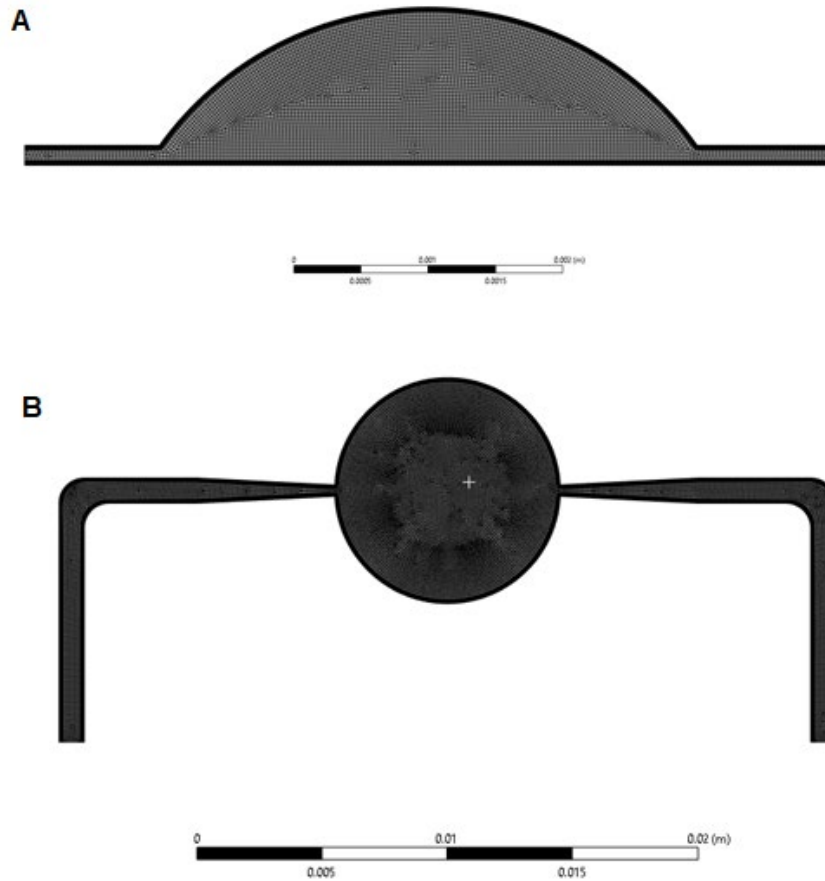

**Figure S2.** Mesh configurations for the numerical simulations. Mesh configuration for the side view (A) and top view (B) simulations.

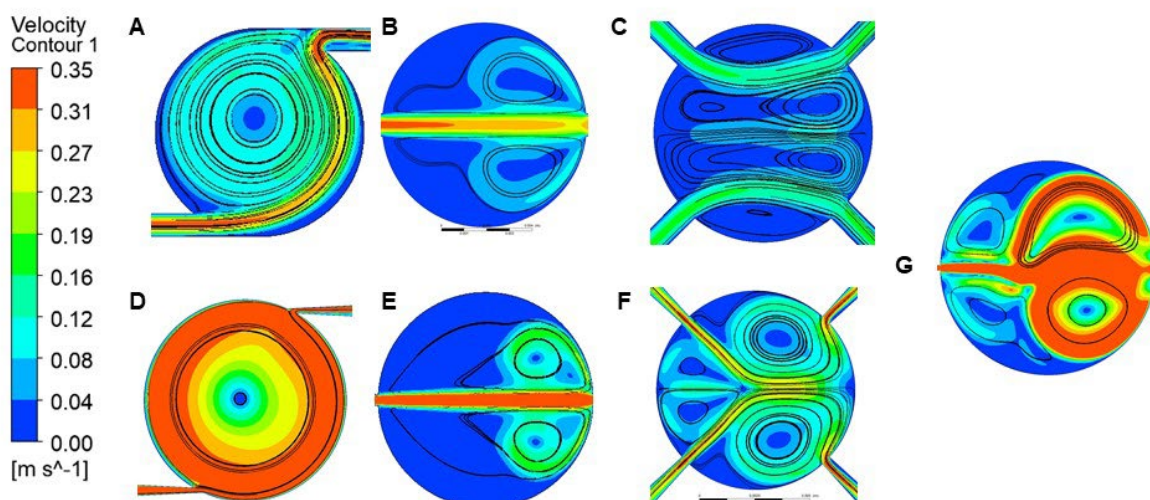

**Figure S3.** Optimization of the mixer design. Numerical simulation results of the streamlines and the velocity contour in the sample well 0.5 s after actuating the mixer having a (A) tangential design with one inlet and one outlet with constant-width channels, (B) radial design with one inlet and one outlet with constant-width channels, (C) radial design with two inlets and two outlets with constant-width channels, (D) tangential design with one inlet and one outlet with nozzles (contraction ratio = 2), (E) radial design with one inlet and one outlet with nozzles (contraction ratio = 2), (F) radial design with two inlets and two outlets with nozzles (contraction ratio = 2), and (G) radial design with one inlet and one outlet with nozzles (constriction ratio = 5).

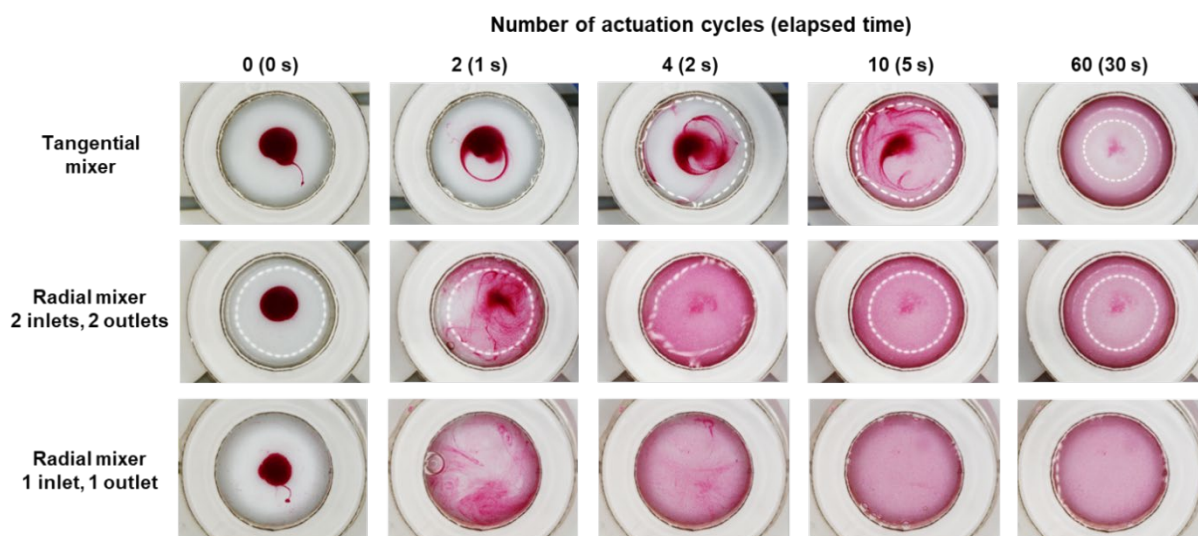

**Figure S4.** Characterization of the finger-actuated mixer for different mixer designs. Sequential still frame images showing the distribution of red polystyrene beads dispensed in a PBS droplet in the sample well of microfluidic chips (without the SPGE sensor) with different mixer designs actuated at  $\sim 2$  Hz.

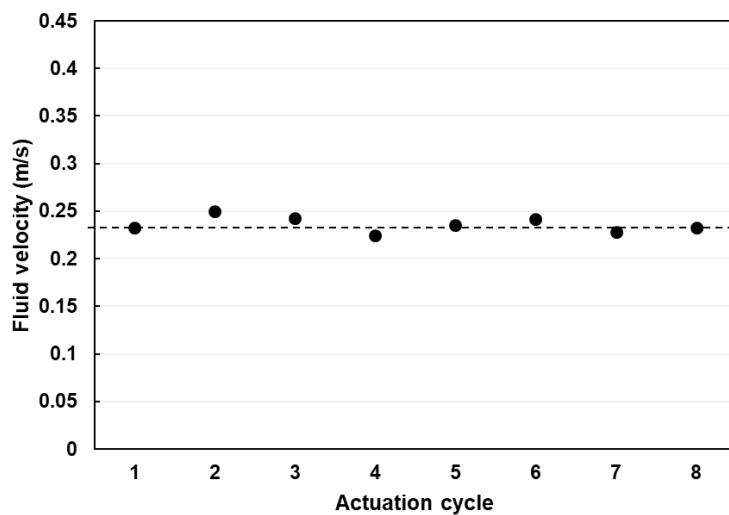

**Figure S5.** Fluid velocity generated in the channel for different actuation cycles using the radial mixer with a single inlet and outlet. The horizontal dashed line represents the mean velocity from all of the actuation cycles.
